# Supplementary material for: Next-generation sequencing predicts interaction network between miRNA and target genes in lipoteichoic acid-stimulated human neutrophils
Source: PubMed Central journal article supplement — Int J Mol Med. 2019 Jul 31;44(4):1436–46. doi: 10.3892/ijmm.2019.4295 (PMC6713436; doi:10.3892/ijmm.2019.4295), 2019-07-31
Supplement: Supplementary_Data.pdf [file Supplementary_Data.pdf]

Figure S1. RNA quality control report. Neutrophils were stimulated with 1  $\mu\text{g/ml}$  LTA. The quality of each sample was examined via the RIN software. The RIN for (A) the Veh group and (B) the LTA group was 7.6 and 8.3, respectively. LTA, lipoteichoic acid; RIN, RNA integrity number; Veh, vehicle.

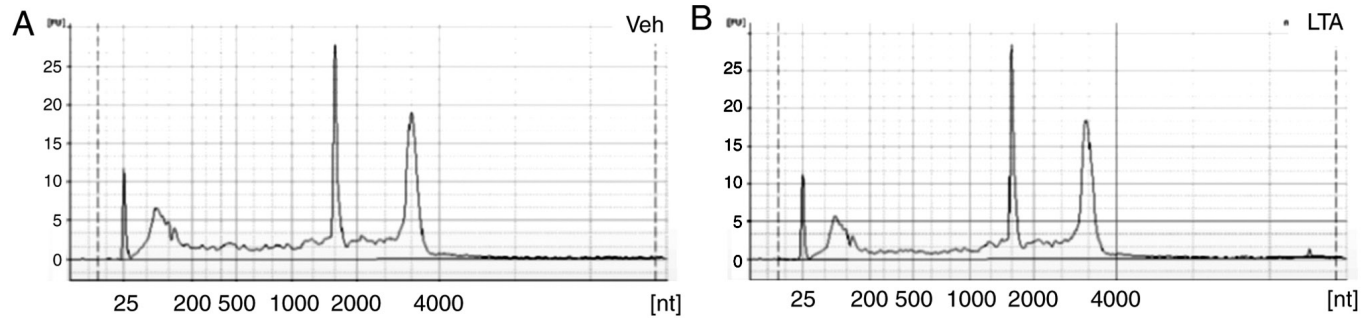

Figure S2. RNA sequencing quality control report. The left panel shows per-base sequence quality and the right panel shows per-sequence quality scores for (A) LTA-stimulated cells and (B) vehicle-treated cells. The quality score from 15-99 bp was considered high (green background). The majority read >35 indicated good sequencing quality. LTA, lipoteichoic acid.

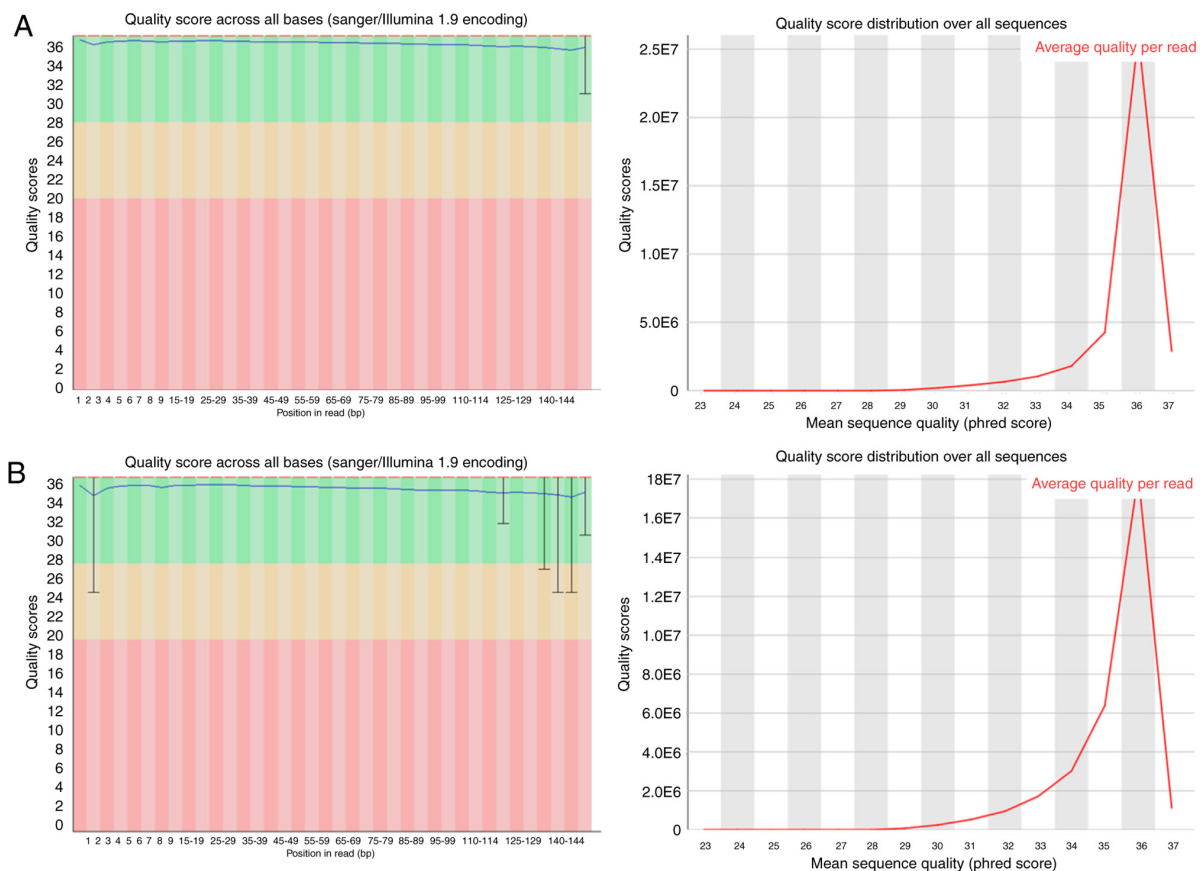

Figure S3. Small RNA sequencing quality control report. The left panel shows per-base sequence quality, and the right panel shows the per-sequence quality scores for (A) LTA-stimulated cells and (B) vehicle-treated cells. The quality score across all bases was considered good (green background). The majority read >35 indicated good sequencing quality. LTA, lipoteichoic acid.

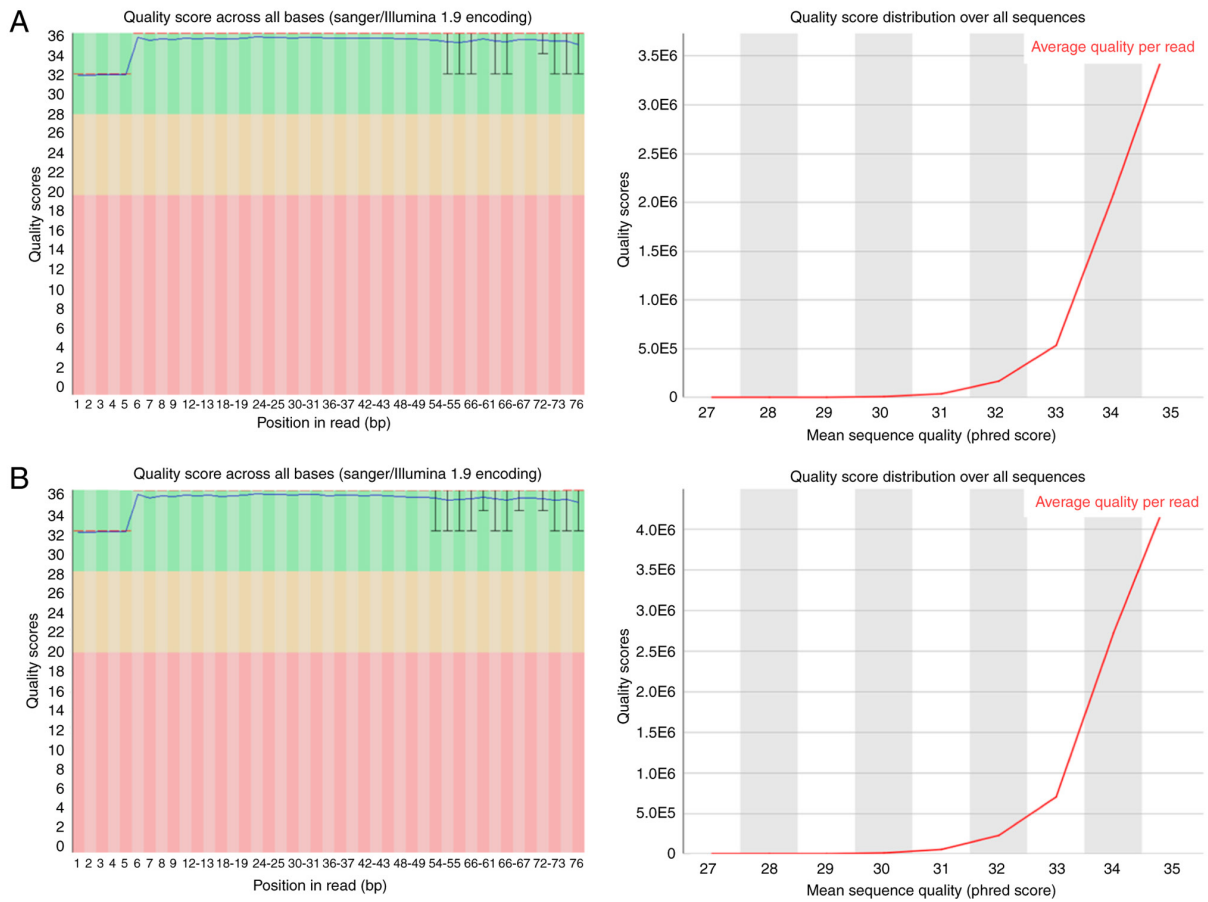

Table SI. RNA and small RNA sequencing summary.

---

A, RNA sequencing

---

| Group | Total reads number | Trimmed read number |
|-------|--------------------|---------------------|
| LTA   | 78,219,068         | 75,223,530          |
| Veh   | 67,615,948         | 64,735,118          |

---

B, Small RNA sequencing

---

| Group | Total reads number | Trimmed read number |
|-------|--------------------|---------------------|
| LTA   | 9,252,412          | 6,582,765           |
| Veh   | 11,807,744         | 8,214,190           |

---

Table SII. List of 290 significant differentially expressed genes.

|    | Gene symbol | Gene description                                         |
|----|-------------|----------------------------------------------------------|
| 1  | FAM214B     | Family with sequence similarity 214 member B             |
| 2  | ALDH3B1     | Aldehyde dehydrogenase 3 family member B1                |
| 3  | PLAUR       | Plasminogen activator, urokinase receptor                |
| 4  | TYROBP      | TYRO protein tyrosine kinase binding protein             |
| 5  | ALOX5       | Arachidonate 5-lipoxygenase                              |
| 6  | SLC11A1     | Solute carrier family 11 member 1                        |
| 7  | RNH1        | Ribonuclease/angiogenin inhibitor 1                      |
| 8  | NDUFS1      | NADH:ubiquinone oxidoreductase core subunit S1           |
| 9  | ATP6V0A1    | ATPase H <sup>+</sup> transporting V0 subunit a1         |
| 10 | APBA2       | Amyloid beta precursor protein binding family A member 2 |
| 11 | TIMP2       | TIMP metalloproteinase inhibitor 2                       |
| 12 | VCAN        | Versican                                                 |
| 13 | CAPG        | Capping actin protein, gelsolin like                     |
| 14 | DKK3        | Dickkopf WNT signaling pathway inhibitor 3               |
| 15 | LAMC2       | Laminin subunit gamma 2                                  |
| 16 | GNA15       | G protein subunit alpha 15                               |
| 17 | BCAT1       | Branched chain amino acid transaminase 1                 |
| 18 | AHRR        | aryl-hydrocarbon receptor repressor                      |
| 19 | EVI5        | Ecotropic viral integration site 5                       |
| 20 | NDST1       | N-deacetylase and N-sulfotransferase 1                   |
| 21 | CA12        | Carbonic anhydrase 12                                    |
| 22 | ARHGEF10L   | Rho guanine nucleotide exchange factor 10 like           |
| 23 | RASAL2      | RAS protein activator like 2                             |
| 24 | BCAP29      | B-cell receptor associated protein 29                    |
| 25 | EPB41L3     | Erythrocyte membrane protein band 4.1 like 3             |
| 26 | SH3BP2      | SH3 domain binding protein 2                             |
| 27 | P2RX7       | Purinergic receptor P2X 7                                |
| 28 | LAG3        | Lymphocyte activating 3                                  |
| 29 | LYZ         | Lysozyme                                                 |
| 30 | NLRC4       | NLR family CARD domain containing 4                      |
| 31 | NRP1        | Neuropilin 1                                             |
| 32 | LGALS1      | Galectin 1                                               |
| 33 | PDGFB       | Platelet derived growth factor subunit B                 |
| 34 | KIAA0930    | KIAA0930                                                 |
| 35 | ITPK1       | Inositol-tetrakisphosphate 1-kinase                      |
| 36 | PAPLN       | Papilin, proteoglycan like sulfated glycoprotein         |
| 37 | MMP9        | Matrix metalloproteinase 9                               |
| 38 | CD40        | CD40 molecule                                            |
| 39 | CTSZ        | Cathepsin Z                                              |
| 40 | CST3        | Cystatin C                                               |
| 41 | TLR8        | Toll like receptor 8                                     |
| 42 | FLT1        | Fms related tyrosine kinase 1                            |
| 43 | BFAR        | Bifunctional apoptosis regulator                         |
| 44 | BCKDK       | Branched chain ketoacid dehydrogenase kinase             |
| 45 | CTSH        | Cathepsin H                                              |
| 46 | CD276       | CD276 molecule                                           |
| 47 | CEMIP       | Cell migration inducing hyaluronan binding protein       |
| 48 | KCNN4       | Potassium calcium-activated channel subfamily N member 4 |
| 49 | FCGRT       | Fc fragment of IgG receptor and transporter              |
| 50 | LILRB1      | Leukocyte immunoglobulin like receptor B1                |
| 51 | HAS1        | Hyaluronan synthase 1                                    |
| 52 | TFPI2       | Tissue factor pathway inhibitor 2                        |
| 53 | MET         | MET proto-oncogene, receptor tyrosine kinase             |
| 54 | CCL24       | C-C motif chemokine ligand 24                            |
| 55 | SNX8        | Sorting nexin 8                                          |
| 56 | CEP41       | Centrosomal protein 41                                   |

Table SII. Continued.

|     | Gene symbol | Gene description                                         |
|-----|-------------|----------------------------------------------------------|
| 57  | ENG         | Endoglin                                                 |
| 58  | RASSF4      | Ras association domain family member 4                   |
| 59  | TBC1D12     | TBC1 domain family member 12                             |
| 60  | P2RX1       | Purinergic receptor P2X 1                                |
| 61  | CCL7        | C-C motif chemokine ligand 7                             |
| 62  | CCL2        | C-C motif chemokine ligand 2                             |
| 63  | CCL1        | C-C motif chemokine ligand 1                             |
| 64  | ABCC3       | ATP binding cassette subfamily C member 3                |
| 65  | TBC1D9      | TBC1 domain family member 9                              |
| 66  | DTX4        | Deltex E3 ubiquitin ligase 4                             |
| 67  | SLC15A3     | Solute carrier family 15 member 3                        |
| 68  | PPFIBP1     | PPFIA binding protein 1                                  |
| 69  | VDR         | Vitamin D (1,25- dihydroxyvitamin D3) receptor           |
| 70  | SASH1       | SAM and SH3 domain containing 1                          |
| 71  | VNN2        | Vanin 2                                                  |
| 72  | SLC16A10    | Solute carrier family 16 member 10                       |
| 73  | HBEGF       | Heparin binding EGF like growth factor                   |
| 74  | IL12B       | Interleukin 12B                                          |
| 75  | DPYSL3      | Dihydropyrimidinase like 3                               |
| 76  | WNT5A       | Wnt family member 5A                                     |
| 77  | STEAP3      | STEAP3 metalloreductase                                  |
| 78  | CCDC88A     | Coiled-coil domain containing 88A                        |
| 79  | KYNU        | Kynureninase                                             |
| 80  | NCF2        | Neutrophil cytosolic factor 2                            |
| 81  | KMO         | Kynurenine 3-monooxygenase                               |
| 82  | AKT3        | AKT serine/threonine kinase 3                            |
| 83  | F3          | Coagulation factor III, tissue factor                    |
| 84  | NEK6        | NIMA related kinase 6 [Source:HGNC Symbol;Acc:HGNC:7749] |
| 85  | NPC2        | NPC intracellular cholesterol transporter 2              |
| 86  | GPR68       | G protein-coupled receptor 68                            |
| 87  | MOB3B       | MOB kinase activator 3B                                  |
| 88  | PLXDC2      | Plexin domain containing 2                               |
| 89  | TGFBI       | Transforming growth factor beta induced                  |
| 90  | TNFRSF8     | TNF receptor superfamily member 8                        |
| 91  | CD80        | CD80 molecule                                            |
| 92  | TNFSF10     | TNF superfamily member 10                                |
| 93  | INHBA       | Inhibin beta A subunit                                   |
| 94  | NT5C3A      | 5'-nucleotidase, cytosolic IIIA                          |
| 95  | EGR2        | Early growth response 2                                  |
| 96  | LRP1        | LDL receptor related protein 1                           |
| 97  | C3          | Complement C3                                            |
| 98  | CD93        | CD93 molecule                                            |
| 99  | IFI6        | Interferon alpha inducible protein 6                     |
| 100 | ADGRE2      | Adhesion G protein-coupled receptor E2                   |
| 101 | GNG11       | G protein subunit gamma 11                               |
| 102 | ARHGAP22    | Rho GTPase activating protein 22                         |
| 103 | SIGLEC9     | Sialic acid binding Ig like lectin 9                     |
| 104 | ERMARD      | ER membrane associated RNA degradation                   |
| 105 | NECTIN2     | Nectin cell adhesion molecule 2                          |
| 106 | LILRB2      | Leukocyte immunoglobulin like receptor B2                |
| 107 | EMILIN2     | Elastin microfibril interfacier 2                        |
| 108 | PTPRE       | Protein tyrosine phosphatase, receptor type E            |
| 109 | RIN2        | Ras and Rab interactor 2                                 |
| 110 | MYBPH       | Myosin binding protein H                                 |
| 111 | PRAM1       | PML-RARA regulated adaptor molecule 1                    |
| 112 | ADAMDEC1    | ADAM like decysin 1                                      |

Table SII. Continued.

|     | Gene symbol | Gene description                                                           |
|-----|-------------|----------------------------------------------------------------------------|
| 113 | MRPS36      | Mitochondrial ribosomal protein S36                                        |
| 114 | RSAD2       | Radical S-adenosyl methionine domain containing 2                          |
| 115 | EMP1        | Epithelial membrane protein 1                                              |
| 116 | SOX5        | SRY-box 5                                                                  |
| 117 | CYP2J2      | Cytochrome P450 family 2 subfamily J member 2                              |
| 118 | ESPL1       | Extra spindle pole bodies like 1, separase                                 |
| 119 | NPL         | N-acetylneuraminase pyruvate lyase                                         |
| 120 | TTLL4       | Tubulin tyrosine ligase like 4                                             |
| 121 | CYP27A1     | Cytochrome P450 family 27 subfamily A member 1                             |
| 122 | CKAP4       | Cytoskeleton associated protein 4                                          |
| 123 | TNS3        | Tensin 3                                                                   |
| 124 | GNPMB       | Glycoprotein nmb                                                           |
| 125 | TTYH3       | Tweety family member 3                                                     |
| 126 | FAM129B     | Family with sequence similarity 129 member B                               |
| 127 | IER3        | Immediate early response 3                                                 |
| 128 | TLR2        | Toll like receptor 2                                                       |
| 129 | MMP7        | Matrix metalloproteinase 7                                                 |
| 130 | THBS1       | Thrombospondin 1                                                           |
| 131 | IFI44L      | Interferon induced protein 44 like                                         |
| 132 | IFI44       | Interferon induced protein 44                                              |
| 133 | CYP1B1      | Cytochrome P450 family 1 subfamily B member 1                              |
| 134 | EMILIN1     | Elastin microfibril interfacer 1                                           |
| 135 | MYOF        | Myoferlin                                                                  |
| 136 | HERC5       | HECT and RLD domain containing E3 ubiquitin protein ligase 5               |
| 137 | FGF2        | Fibroblast growth factor 2                                                 |
| 138 | FAM60A      | Family with sequence similarity 60 member A                                |
| 139 | GAS2L3      | Growth arrest specific 2 like 3                                            |
| 140 | GALNT6      | Polypeptide N-acetylgalactosaminyltransferase 6                            |
| 141 | RTN1        | Reticulon 1                                                                |
| 142 | ARRDC4      | Arrestin domain containing 4                                               |
| 143 | ITGAX       | Integrin subunit alpha X                                                   |
| 144 | IFITM3      | Interferon induced transmembrane protein 3                                 |
| 145 | RCN3        | Reticulocalbin 3                                                           |
| 146 | XCL2        | X-C motif chemokine ligand 2                                               |
| 147 | RGL1        | Ral guanine nucleotide dissociation stimulator like 1                      |
| 148 | NCEH1       | Neutral cholesterol ester hydrolase 1                                      |
| 149 | LPP         | LIM domain containing preferred translocation partner in lipoma            |
| 150 | PDGFC       | Platelet derived growth factor C                                           |
| 151 | LHFPL2      | Lipoma HMGIC fusion partner-like 2                                         |
| 152 | PLA2G7      | Phospholipase A2 group VII                                                 |
| 153 | DOK3        | Docking protein 3                                                          |
| 154 | ARHGAP18    | Rho GTPase activating protein 18                                           |
| 155 | GBGT1       | Globoside alpha-1,3-N-acetylgalactosaminyltransferase 1 (FORS blood group) |
| 156 | ANKRD1      | Ankyrin repeat domain 1                                                    |
| 157 | SOGA1       | Suppressor of glucose, autophagy associated 1                              |
| 158 | FAM124A     | Family with sequence similarity 124 member A                               |
| 159 | HNMT        | Histamine N-methyltransferase                                              |
| 160 | CRIM1       | Cysteine rich transmembrane BMP regulator 1                                |
| 161 | SLC7A11     | Solute carrier family 7 member 11                                          |
| 162 | TMEM45B     | Transmembrane protein 45B                                                  |
| 163 | GLT1D1      | Glycosyltransferase 1 domain containing 1                                  |
| 164 | RASGRP3     | RAS guanyl releasing protein 3                                             |
| 165 | DAB2        | DAB2, clathrin adaptor protein                                             |
| 166 | PID1        | Phosphotyrosine interaction domain containing 1                            |
| 167 | CXCL13      | C-X-C motif chemokine ligand 13                                            |
| 168 | MAP3K7CL    | MAP3K7 C-terminal like                                                     |

Table SII. Continued.

|     | Gene symbol | Gene description                                          |
|-----|-------------|-----------------------------------------------------------|
| 169 | CD109       | CD109 molecule                                            |
| 170 | MMP14       | Matrix metalloproteinase 14                               |
| 171 | FAM213B     | Family with sequence similarity 213 member B              |
| 172 | FANCC       | Fanconi anemia complementation group C                    |
| 173 | MRAS        | Muscle RAS oncogene homolog                               |
| 174 | SLAMF8      | SLAM family member 8                                      |
| 175 | ABR         | Active BCR-related                                        |
| 176 | PTGIR       | Prostaglandin I2 (prostacyclin) receptor (IP)             |
| 177 | HK3         | Hexokinase 3                                              |
| 178 | FBXL13      | F-box and leucine rich repeat protein 13                  |
| 179 | AK4         | Adenylate kinase 4                                        |
| 180 | PDPN        | Podoplanin                                                |
| 181 | NEXN        | Nexilin F-actin binding protein                           |
| 182 | ATF3        | Activating transcription factor 3                         |
| 183 | SLC22A15    | Solute carrier family 22 member 15                        |
| 184 | RBM47       | RNA binding motif protein 47                              |
| 185 | CXCL3       | C-X-C motif chemokine ligand 3                            |
| 186 | CXCL5       | C-X-C motif chemokine ligand 5                            |
| 187 | PPBP        | Pro-platelet basic protein                                |
| 188 | CDCP1       | CUB domain containing protein 1                           |
| 189 | TLR3        | Toll like receptor 3                                      |
| 190 | CSF2        | Colony stimulating factor 2                               |
| 191 | CTSB        | Cathepsin B                                               |
| 192 | ABCA1       | ATP binding cassette subfamily A member 1                 |
| 193 | FBP1        | Fructose-bisphosphatase 1                                 |
| 194 | CYBB        | Cytochrome b-245 beta chain                               |
| 195 | ARHGEF40    | Rho guanine nucleotide exchange factor 40                 |
| 196 | ANPEP       | Alanyl aminopeptidase, membrane                           |
| 197 | MS4A7       | Membrane spanning 4-domains A7                            |
| 198 | MS4A14      | Membrane spanning 4-domains A14                           |
| 199 | CACNB3      | Calcium voltage-gated channel auxiliary subunit beta 3    |
| 200 | LENG8       | Leukocyte receptor cluster member 8                       |
| 201 | SEMA6B      | Semaphorin 6B                                             |
| 202 | VPS37C      | VPS37C, ESCRT-I subunit                                   |
| 203 | RAB31       | RAB31, member RAS oncogene family                         |
| 204 | ADAM9       | ADAM metalloproteinase domain 9                           |
| 205 | FAM84B      | Family with sequence similarity 84 member B               |
| 206 | PXDC1       | PX domain containing 1                                    |
| 207 | MN1         | MN1 proto-oncogene, transcriptional regulator             |
| 208 | CXCL10      | C-X-C motif chemokine ligand 10                           |
| 209 | SDC2        | Syndecan 2                                                |
| 210 | MT1E        | Metallothionein 1E                                        |
| 211 | REPS2       | RALBP1 associated Eps domain containing 2                 |
| 212 | CD14        | CD14 molecule                                             |
| 213 | CEACAM3     | Carcinoembryonic antigen related cell adhesion molecule 3 |
| 214 | GAA         | Glucosidase alpha, acid                                   |
| 215 | P2RY6       | Pyrimidinergic receptor P2Y6                              |
| 216 | TMEM51      | Transmembrane protein 51                                  |
| 217 | CLEC12A     | C-type lectin domain family 12 member A                   |
| 218 | ARNT2       | Aryl hydrocarbon receptor nuclear translocator 2          |
| 219 | SMPDL3A     | Sphingomyelin phosphodiesterase acid like 3A              |
| 220 | CCL19       | C-C motif chemokine ligand 19                             |
| 221 | HPSE        | Heparanase                                                |
| 222 | C1QB        | Complement C1q B chain                                    |
| 223 | OLR1        | Oxidized low density lipoprotein receptor 1               |
| 224 | C1QTNF1     | C1q and TNF related 1                                     |



Table SII. Continued.

|     | Gene symbol | Gene description                                              |
|-----|-------------|---------------------------------------------------------------|
| 225 | SH3PXD2B    | SH3 and PX domains 2B                                         |
| 226 | CHST2       | Carbohydrate sulfotransferase 2                               |
| 227 | LRRC25      | Leucine rich repeat containing 25                             |
| 228 | UCP2        | Uncoupling protein 2                                          |
| 229 | MSRA        | Methionine sulfoxide reductase A                              |
| 230 | TUBB6       | Tubulin beta 6 class V                                        |
| 231 | JAKMIP2     | Janus kinase and microtubule interacting protein 2            |
| 232 | RUFY1       | RUN and FYVE domain containing 1                              |
| 233 | METRNL      | Meteorin like, glial cell differentiation regulator           |
| 234 | B3GNT8      | UDP-GlcNAc:betaGal beta-1,3-N-acetylglucosaminyltransferase 8 |
| 235 | TOP3A       | Topoisomerase (DNA) III alpha                                 |
| 236 | CD163       | CD163 molecule                                                |
| 237 | FAM20C      | FAM20C, golgi associated secretory pathway kinase             |
| 238 | KCTD12      | Potassium channel tetramerization domain containing 12        |
| 239 | THBD        | Thrombomodulin                                                |
| 240 | LDLRAD3     | Low density lipoprotein receptor class A domain containing 3  |
| 241 | RAB39A      | RAB39A, member RAS oncogene family                            |
| 242 | LACC1       | Laccase domain containing 1                                   |
| 243 | TMEM150B    | Transmembrane protein 150B                                    |
| 244 | HIST1H2BC   | Histone cluster 1 H2B family member c                         |
| 245 | MB21D2      | Mab-21 domain containing 2                                    |
| 246 | ZNF707      | Zinc finger protein 707                                       |
| 247 | TNFSF15     | TNF superfamily member 15                                     |
| 248 | CHST15      | Carbohydrate sulfotransferase 15                              |
| 249 | CSF1R       | Colony stimulating factor 1 receptor                          |
| 250 | MCEMP1      | Mast cell expressed membrane protein 1                        |
| 251 | ADAP2       | ArfGAP with dual PH domains 2                                 |
| 252 | PRR16       | Proline rich 16                                               |
| 253 | USP18       | Ubiquitin specific peptidase 18                               |
| 254 | IL3RA       | Interleukin 3 receptor subunit alpha                          |
| 255 | RASA3       | RAS p21 protein activator 3                                   |
| 256 | RXRA        | Retinoid X receptor alpha                                     |
| 257 | CD300E      | CD300e molecule                                               |
| 258 | SEPT10      | Septin 10                                                     |
| 259 | TNFRSF4     | TNF receptor superfamily member 4                             |
| 260 | MITF        | Melanogenesis associated transcription factor                 |
| 261 | SHTN1       | Shootin 1                                                     |
| 262 | GPR89B      | G protein-coupled receptor 89B                                |
| 263 | H1FO        | H1 histone family member 0                                    |
| 264 | PLXNB2      | Plexin B2                                                     |
| 265 | DAPK1       | Death associated protein kinase 1                             |
| 266 | ADA         | Adenosine deaminase                                           |
| 267 | SRC         | SRC proto-oncogene, non-receptor tyrosine kinase              |
| 268 | C5AR1       | Complement C5a receptor 1                                     |
| 269 | PDGFA       | Platelet derived growth factor subunit A                      |
| 270 | MPEG1       | Macrophage expressed 1                                        |
| 271 | CFAP43      | Cilia and flagella associated protein 43                      |
| 272 | C1orf122    | Chromosome 1 open reading frame 122                           |
| 273 | LPAR1       | Lysophosphatidic acid receptor 1                              |
| 274 | SOWAH3      | Sosondawah ankyrin repeat domain family member C              |
| 275 | CSF2RA      | Colony stimulating factor 2 receptor alpha subunit            |
| 276 | CTNND1      | Catenin delta 1                                               |
| 277 | MAFB        | MAF bZIP transcription factor B                               |
| 278 | C2CD4B      | C2 calcium dependent domain containing 4B                     |
| 279 | NAP1L4      | Nucleosome assembly protein 1 like 4                          |
| 280 | SMIM11A     | Small integral membrane protein 11A                           |

Table SII. Continued.

|     | Gene symbol | Gene description                                                                |
|-----|-------------|---------------------------------------------------------------------------------|
| 281 | ITPRIPL2    | Inositol 1,4,5-trisphosphate receptor interacting protein like 2                |
| 282 | S1PR3       | Sphingosine-1-phosphate receptor 3                                              |
| 283 | PPM1N       | Protein phosphatase, Mg <sup>2+</sup> /Mn <sup>2+</sup> dependent 1N (putative) |
| 284 | TSPAN4      | Tetraspanin 4                                                                   |
| 285 | IFI30       | IFI30, lysosomal thiol reductase                                                |
| 286 | ETV5        | ETS variant 5                                                                   |
| 287 | CLEC5A      | C-type lectin domain containing 5A                                              |
| 288 | ITGB3       | Integrin subunit beta 3                                                         |
| 289 | SRXN1       | Sulfiredoxin 1                                                                  |
| 290 | MILR1       | Mast cell immunoglobulin like receptor 1                                        |

Table SIII. Enriched biological pathways in LTA-stimulated neutrophils (including gene list).

| GO ID       | GO Term                                            | Genes                                                                                                                                                                                                                                                                                                                                                                                                                                                                                           | FDR      |
|-------------|----------------------------------------------------|-------------------------------------------------------------------------------------------------------------------------------------------------------------------------------------------------------------------------------------------------------------------------------------------------------------------------------------------------------------------------------------------------------------------------------------------------------------------------------------------------|----------|
| GO:0030335  | Positive regulation of cell migration              | WNT5A, CCL2, NRP1, SHTN1, PDGFB, CXCL5, PDGFA, MMP9, CXCL3, ITGB3, LPAR1, CCL7, SRC, CXCL10, CCL24, P2RY6, DAB2, PDGFC, GPNMB, THBS1, FGF2, CSF1R, ADAM9, SASH1, C5AR1, FLT1, MET, CCL19, MMP14, SEMA6B, PPBP, CXCL13, F3, CEMIP, PLA2G7, HBEGF, LAMC2, CTSH                                                                                                                                                                                                                                    | 1.29E-15 |
| GO:0051272  | Positive regulation of cellular component movement | WNT5A, CCL2, NRP1, SHTN1, PDGFB, CXCL5, PDGFA, MMP9, CXCL3, ITGB3, LPAR1, CCL7, SRC, CXCL10, CCL24, P2RY6, DAB2, PDGFC, GPNMB, THBS1, FGF2, CSF1R, ADAM9, SASH1, C5AR1, FLT1, PDPN, MET, CCL19, MMP14, SEMA6B, PPBP, CXCL13, F3, CEMIP, PLA2G7, HBEGF, LAMC2, CTSH                                                                                                                                                                                                                              | 1.36E-15 |
| GO:2000147  | Positive regulation of cell motility               | WNT5A, CCL2, NRP1, SHTN1, PDGFB, CXCL5, PDGFA, MMP9, CXCL3, ITGB3, LPAR1, CCL7, SRC, CXCL10, CCL24, P2RY6, DAB2, PDGFC, GPNMB, THBS1, FGF2, CSF1R, ADAM9, SASH1, C5AR1, FLT1, MET, CCL19, MMP14, SEMA6B, PPBP, CXCL13, F3, CEMIP, PLA2G7, HBEGF, LAMC2, CTSH                                                                                                                                                                                                                                    | 4.11E-15 |
| GO:0030334  | Regulation of cell migration                       | WNT5A, CCL2, CYP1B1, NRP1, SHTN1, PDGFB, CXCL5, PDGFA, MMP9, CXCL3, ITGB3, LPAR1, CCL7, SRC, ADA, CXCL10, CCL24, P2RY6, DAB2, PDGFC, THBS1, GPNMB, FGF2, CSF1R, ADAM9, SASH1, C5AR1, FLT1, ABR, PLXNB2, MET, CCL19, DPYSL3, NEXN, MMP14, FAM60A, SEMA6B, LRP1, PPBP, HAS1, CXCL13, F3, CEMIP, PLA2G7, HBEGF, LAMC2, CTSH, ENG                                                                                                                                                                   | 5.16E-15 |
| GO:0040017~ | Positive regulation of locomotion                  | WNT5A, CCL2, NRP1, SHTN1, PDGFB, CXCL5, PDGFA, MMP9, CXCL3, ITGB3, LPAR1, CCL7, SRC, CXCL10, CCL24, P2RY6, DAB2, PDGFC, GPNMB, THBS1, FGF2, CSF1R, ADAM9, SASH1, C5AR1, FLT1, MET, CCL19, MMP14, SEMA6B, PPBP, CXCL13, F3, CEMIP, PLA2G7, HBEGF, LAMC2, CTSH                                                                                                                                                                                                                                    | 1.16E-14 |
| GO:2000145  | Regulation of cell motility                        | WNT5A, CCL2, CYP1B1, NRP1, SHTN1, PDGFB, CXCL5, PDGFA, MMP9, CXCL3, ARHGAP18, ITGB3, LPAR1, CCL7, SRC, ADA, CXCL10, CCL24, P2RY6, DAB2, PDGFC, THBS1, GPNMB, FGF2, CSF1R, ADAM9, SASH1, C5AR1, FLT1, ABR, PLXNB2, MET, CCL19, DPYSL3, NEXN, MMP14, FAM60A, SEMA6B, LRP1, PPBP, HAS1, CXCL13, F3, CEMIP, PLA2G7, HBEGF, LAMC2, CTSH, ENG                                                                                                                                                         | 1.65E-14 |
| GO:0006954  | Inflammatory response                              | CCL1, WNT5A, CCL2, NDST1, CXCL5, C3, CXCL3, TLR2, TLR3, TNFRSF8, GPR68, TNFRSF4, TLR8, CCL7, ADA, CXCL10, CCL24, SLC11A1, S1PR3, NLRC4, PTGIR, THBS1, CSF1R, C5AR1, ADGRE2, ABR, OLR1, LYZ, CD276, CHST2, CCL19, CD40, CD163, P2RX7, CYBB, P2RX1, PPBP, CXCL13, F3, PLA2G7, METRNL, ALOX5, IL12B, XCL2, CD14                                                                                                                                                                                    | 5.54E-14 |
| GO:0040012  | Regulation of locomotion                           | WNT5A, CCL2, CYP1B1, NRP1, SHTN1, PDGFB, CXCL5, PDGFA, MMP9, CXCL3, ARHGAP18, ITGB3, LPAR1, CCL7, SRC, ADA, CXCL10, CCL24, P2RY6, DAB2, PDGFC, THBS1, GPNMB, FGF2, CSF1R, ADAM9, SASH1, C5AR1, FLT1, ABR, PLXNB2, MET, CCL19, DPYSL3, NEXN, MMP14, FAM60A, SEMA6B, LRP1, PPBP, HAS1, CXCL13, F3, CEMIP, PLA2G7, HBEGF, LAMC2, CTSH, ENG                                                                                                                                                         | 8.90E-14 |
| GO:0006952  | Defense response                                   | KYNU, NDST1, TLR2, TLR3, IFI44L, TLR8, CXCL10, S1PR3, NLRC4, PTGIR, USP18, LAG3, C5AR1, ADGRE2, NCF2, CST3, LYZ, HERC5, CHST2, NECTIN2, CD40, CD163, DAPK1, LILRB1, LILRB2, INHBA, CIQB, PPBP, F3, PLA2G7, IL12B, CTSB, CLEC5A, CCL1, WNT5A, CCL2, CXCL5, C3, IFITM3, CXCL3, IFI30, RSAD2, TNFRSF8, GPR68, TNFRSF4, CCL7, ADA, SRC, CCL24, SLC11A1, ITGAX, THBS1, TYROBP, CSF1R, HIST1H2BC, ABR, OLR1, CD276, CD300E, CCL19, KCNN4, CYBB, P2RX7, P2RX1, CXCL13, METRNL, ALOX5, XCL2, IFI6, CD14 | 9.19E-14 |

Table SIII. Continued.

| GO ID      | GO Term                                   | Genes                                                                                                                                                                                                                                                                                                                                                                                                                                                                                                                                                                                                                                                                                                                                                                                                        | FDR      |
|------------|-------------------------------------------|--------------------------------------------------------------------------------------------------------------------------------------------------------------------------------------------------------------------------------------------------------------------------------------------------------------------------------------------------------------------------------------------------------------------------------------------------------------------------------------------------------------------------------------------------------------------------------------------------------------------------------------------------------------------------------------------------------------------------------------------------------------------------------------------------------------|----------|
| GO:0051270 | Regulation of cellular component movement | NRP1, PDGFB, SHTN1, PDGFA, MMP9, ARHGAP18, LPAR1, CXCL10, DAB2, PDGFC, FGF2, ADAM9, C5AR1, PDPN, PLXNB2, MMP14, NEXN, PPBP, HAS1, F3, CEMIP, PLA2G7, LAMC2, CTSH, WNT5A, CCL2, CYP1B1, CXCL5, CXCL3, ITGB3, SRC, ADA, CCL7, CCL24, P2RY6, GPNMB, THBS1, CSF1R, SASH1, FLT1, ABR, MET, CCL19, DPYSL3, FAM60A, SEMA6B, LRP1, CXCL13, HBEGF, ENG                                                                                                                                                                                                                                                                                                                                                                                                                                                                | 9.93E-14 |
| GO:0016477 | Cell migration                            | NRP1, SHTN1, PDGFB, PDGFA, MMP9, MIF, LPAR1, SDC2, CXCL10, DAB2, PDGFC, FGF2, ADAM9, C5AR1, ADGRE2, CCDC88A, PLXNB2, MMP14, SLC7A11, TNS3, THBD, PPBP, HAS1, F3, CEMIP, PLA2G7, LAMC2, VCAN, IL12B, CTSH, CCL1, WNT5A, CCL2, CYP1B1, CXCL5, CXCL3, ITGB3, CCL7, SRC, ADA, CCL24, P2RY6, ITGAX, THBS1, GPNMB, CSF1R, SASH1, FLT1, ABR, OLR1, MET, CCL19, DPYSL3, FAM60A, SEMA6B, LRP1, CXCL13, HBEGF, XCL2, ENG                                                                                                                                                                                                                                                                                                                                                                                               | 6.33E-13 |
| GO:0070887 | Cellular response to chemical stimulus    | GNA15, CYP2J2, NRP1, PDGFB, NDST1, FAM20C, TNFSF15, TLR2, TLR3, ANKRD1, LPAR1, CXCL10, USP18, PTGIR, DAB2, PDGFC, FGF2, CSF2RA, ADAM9, FANCC, PID1, C5AR1, EGR2, SOGA1, ADGRE2, RXRA, CST3, FBP1, CD40, ALDH3B1, DAPK1, LILRB1, LILRB2, INHBA, PPBP, CD80, HAS1, F3, PLA2G7, IL12B, CTSB, CTSH, SRXN1, CCL1, WNT5A, CSF2, CCL2, CYP1B1, CXCL5, IFITM3, CXCL3, SOX5, CD109, IFI30, TNFRSF8, RSAD2, GNG11, GPR68, ABCA1, ITGB3, TNFRSF4, CCL7, SRC, CCL24, VDR, P2RY6, MT1E, THBS1, ETV5, MYOF, CSF1R, SASH1, PTPRE, FLT1, NCEH1, LGALS1, MET, CCL19, DPYSL3, BFAR, DKK3, RAB31, CYBB, P2RX7, ATF3, CXCL13, UCP2, HBEGF, TP6V0A1, ENG, XCL2, IFI6, ACD14, IL3RA                                                                                                                                                | 1.89E-12 |
| GO:0006950 | Response to stress                        | GNA15, PDGFB, PDGFA, ARNT2, TLR2, TLR3, ANKRD1, TLR8, CXCL10, S1PR3, NLRC4, PTGIR, PDGFC, ITPK1, TFPI2, ADAM9, C5AR1, NCF2, PDPN, CST3, CD40, PLAUR, LILRB1, LILRB2, C1QB, THBD, PPBP, F3, CLEC5A, NEK6, SRXN1, WNT5A, CCL1, CYP1B1, CCL2, IFITM3, IFI30, KMO, ABCA1, ITGB3, ADA, CCL7, SRC, SLC11A1, ITGAX, HNMT, ARHGEF10L, TYROBP, CSF1R, SASH1, ABR, LGALS1, MET, CD300E, CD276, BFAR, P2RX7, ATF3, P2RX1, UCP2, CXCL13, XCL2, ENG, IFI6, IER3, KYNU, NRP1, NDST1, IFI44L, USP18, MSRA, HPSE, FGF2, LAG3, FANCC, ADGRE2, CHST2, HERC5, LYZ, NECTIN2, MMP14, SLC7A11, ALDH3B1, DAPK1, CD163, INHBA, TOP3A, PLA2G7, IL12B, CTSB, CSF2, CXCL5, C3, CXCL3, CD109, RSAD2, TNFRSF8, GPR68, TNFRSF4, CCL24, C1QTNF1, THBS1, MYOF, ETV5, HIST1H2BC, OLR1, CCL19, DPYSL3, KCNN4, CYBB, HBEGF, METRNL, ALOX5, CD14 | 4.21E-12 |
| GO:0009605 | Response to external stimulus             | KYNU, NRP1, PDGFB, PDGFA, MMP7, TLR2, TLR3, IFI44L, ANKRD1, LPAR1, TLR8, CXCL10, NLRC4, PTGIR, HPSE, FGF2, ADAM9, C5AR1, EGR2, ADGRE2, PLXNB2, CST3, LYZ, HERC5, IFI44, CD40, MMP14, PLAUR, LILRB1, LILRB2, NPC2, THBD, CD80, PPBP, F3, PLA2G7, IL12B, CCL1, WNT5A, CSF2, CCL2, CXCL5, C3, IFITM3, CXCL3, CD109, TNFRSF8, RSAD2, ABCA1, ITGB3, TNFRSF4, CCL7, ADA, SRC, CCL24, VDR, SLC11A1, ITGAX, C1QTNF1, GPNMB, THBS1, CSF1R, SASH1, HIST1H2BC, ABR, FLT1, MET, CD276, CCL19, CYBB, P2RX7, SEMA6B, ATF3, CXCL13, UCP2, HBEGF, METRNL, ENG, XCL2, CD14                                                                                                                                                                                                                                                    | 8.19E-12 |

Table III. Continued.

| GO ID      | GO Term                                 | Genes                                                                                                                                                                                                                                                                                                                                                                                                                                                                                                                                                                                                                                                        | FDR      |
|------------|-----------------------------------------|--------------------------------------------------------------------------------------------------------------------------------------------------------------------------------------------------------------------------------------------------------------------------------------------------------------------------------------------------------------------------------------------------------------------------------------------------------------------------------------------------------------------------------------------------------------------------------------------------------------------------------------------------------------|----------|
| GO:0051674 | Localization of cell                    | NRP1, SHTN1, PDGFB, PDGFA, MMP9, MITF, LPAR1, SDC2, CXCL10, DAB2, PDGFC, FGF2, ADAM9, C5AR1, ADGRE2,CCDC88A, PDPN, PLXNB2, NEXN, MMP14, SLC7A11, TNS3, THBD, PPBP, HAS1, F3, CEMIP, PLA2G7, VCAN, LAMC2, ITGB3,IL12B, CTSH, CCL1, WNT5A, CCL2, CYP1B1, CXCL5, CXCL3,CCL7, SRC, ADA, CCL24, P2RY6, ITGAX, THBS1, GPNMB, CSF1R, SASH1, FLT1, ABR, OLR1, MET, CCL19, DPYSL3, FAM60A, SEMA6B, LRP1, CXCL13, HBEGF, XCL2, ENG                                                                                                                                                                                                                                     | 8.62E-12 |
| GO:0048870 | Cell motility                           | NRP1, SHTN1, PDGFB, PDGFA, MMP9, MITF, LPAR1, SDC2, CXCL10, DAB2, PDGFC, FGF2, ADAM9, C5AR1, ADGRE2,CCDC88A, PDPN, PLXNB2, NEXN, MMP14, SLC7A11, TNS3, THBD, PPBP, HAS1, F3, CEMIP, PLA2G7, VCAN, LAMC2, IL12B,CTSH, CCL1, WNT5A, CCL2, CYP1B1, CXCL5, CXCL3, ITGB3,CCL7, SRC, ADA, CCL24, P2RY6, ITGAX, THBS1, GPNMB, CSF1R,SASH1, FLT1, ABR, OLR1, MET, CCL19, DPYSL3, FAM60A, SEMA6B, LRP1, CXCL13, HBEGF, XCL2, ENG                                                                                                                                                                                                                                      | 8.62E-12 |
| GO:0007166 | Cell surface receptor signaling pathway | NRP1, PDGFB, NDST1, SHTN1, PDGFA, MMP9, TSPAN4, TNFSF15, TLR2, TLR3, SDC2, CXCL10, S1PR3, USP18, PTGIR, DAB2, PDGFC, FGF2, LAG3, CSF2RA, ADAM9, PID1, C5AR1, SOGA1, ADGRE2, NCF2, PLXNB2, CD40, MMP14, DAPK1, PLAUR, LILRB1, LILRB2, INHBA, PPBP, F3, PRAM1, IL12B, CCL1, WNT5A, CSF2, REPS2, CCL2, CXCL5, IFITM3, CXCL3,CD109, IFI30, TNFRSF8, CTNND1, RSAD2, CACNB3, FCGRT,ITGB3, ABCA1, TNFRSF4, CCL7, ADA, SIGLEC9, SRC, CCL24, P2RY6, ITGAX, THBS1, CRIM1, TYROBP, CSF1R, DTX4, SASH1 PTPRE, FLT1, NCEH1, MET, CCL19,KCNN4, DKK3, CYBB,SEMA6B, TNFSF10, P2RX7, ATF3, LRP1, P2RX1, CXCL13, HBEGF, ATP6V0A1, ENG, XCL2, IFI6, ADAMDEC1, CD14, IL3RA       | 2.61E-11 |
| GO:0032879 | Regulation of localization              | NRP1, SHTN1, PDGFB, PDGFA, MMP9, TLR2, ARHGAP18, TLR3, ANKRD1, LPAR1, TLR8, CXCL10, GPR89B, DAB2, TBC1D12,EVI5, PDGFC, FGF2, ADAM9, PID1, C5AR1, PDPN, PLXNB2,CD40, NEXN, MMP14, DAPK1, LILRB1, LILRB2, INHBA, PPBP, HAS1, F3, PRAM1, PLA2G7, CEMIP, C2CD4B, LAMC2, IL12B, CLEC5A, CTSH, WNT5A, CCL2, CYP1B1, CXCL5, C3, TBC1D9,CXCL3, RSAD2, CACNB3, GPR68, ABCA1, ITGB3, TNFRSF4,CCL7, ADA, SRC, CCL24, SLC11A1, P2RY6, ITGAX, HNMT,C1QTNF1, RASA3, GPNMB, THBS1, CSF1R, SASH1, ABR, FLT1, MET, CD276, RUFY1, CCL19, DPYSL3, FAM60A, KCNN4, CYBB, P2RX7, SEMA6B, LRP1, P2RX1, CXCL13, UCP2, HBEGF, ENG, CD14                                               | 6.54E-11 |
| GO:0010033 | Response to organic substance           | GNA15, KYNU, NRP1, PDGFB, NDST1, FAM20C, ARNT2, TNFSF15, TLR2, TLR3, ANKRD1, LPAR1, CXCL10, USP18, PTGIR, DAB2, PDGFC, FGF2, CSF2RA, ADAM9, PID1, C5AR1, EGR2, SOGA1, RXRA, CST3, CD40, MMP14, SLC7A11, DAPK1, LILRB1, LILRB2, INHBA, THBD, PPBP, CD80, HAS1, F3, IL12B, CTSB, CTSH, CCL1, WNT5A, CSF2, CCL2, CYP1B1, CXCL5, IFITM3, CXCL3, SOX5, CD109, IFI30, TNFRSF8, RSAD2, GNG11, GPR68, ABCA1, ITGB3, TIMP2, TNFRSF4, CCL7, ADA, SRC, CCL24, VDR, SLC11A1, P2RY6, HNMT, THBS1, MYOF, CSF1R, SASH1, PTPRE, ABR, FLT1, LGALS1, CCL19, DPYSL3, BFAR, DKK3, RAB31, CYBB, TNFSF10, P2RX7, ATF3, P2RX1, UCP2, CXCL13, ATP6V0A1, ENG, XCL2, IFI6, CD14, IL3RA | 9.42E-11 |

Table SIII. Continued.

| GO ID      | GO Term                            | Genes                                                                                                                                                                                                                                                                                                                                                                                                                                                                                                                                                                                                                                                                                                                                                                                          | FDR      |
|------------|------------------------------------|------------------------------------------------------------------------------------------------------------------------------------------------------------------------------------------------------------------------------------------------------------------------------------------------------------------------------------------------------------------------------------------------------------------------------------------------------------------------------------------------------------------------------------------------------------------------------------------------------------------------------------------------------------------------------------------------------------------------------------------------------------------------------------------------|----------|
| GO:0048583 | Regulation of response to stimulus | PDGFB, PDGFA, MMP9, FAM20C, TLR2, TNFSF15, TLR3, ANKRD1, LPAR1, TLR8, CXCL10, GPR89B, NLRC4, PTGIR, DAB2, ARHGEF40, PDGFC, ADAM9, PID1, C5AR1, FBP1, CD40, PLAUR, LILRB1, LILRB2, C1QB, THBD, PPBP, F3, PRAM1, NEK6, WNT5A, CCL1, CYP1B1, CCL2, FCGRT, CACNB3, ABCA1, ITGB3, TIMP2, ADA, CCL7, SRC, RASAL2, SLC11A1, ARHGEF10L, TYROBP, CSF1R, SASH1, ABR, LGALS1, MET, CD300E, CD276, BFAR, TNFSF10, P2RX7, SEMA6B, ATF3, UCP2, CXCL13, XCL2, ENG, IFI6, IER3, NRP1, ARHGAP18, ARHGAP22, USP18, HPSE, FGF2, LAG3, HERC5, NECTIN2, MMP14, DAPK1, INHBA, CD80, TOP3A, PLA2G7, IL12B, CTSB, CTSH, CSF2, CXCL5, C3, CXCL3, CD109, RSAD2, CTNND1, GPR68, MAP3K7CL, TNFRSF4, SIGLEC9, CCL24, C1QTNF1, GPNMB, RASA3, THBS1, MYOF, FLT1, PTPRE, CCL19, KCNN4, DKK3, LRP1, HBEGF, METRNL, CD14, SH3BP2 | 1.14E-10 |

Table SIV. Enriched KEGG pathways in LTA-stimulated neutrophils (including gene list).

| Path ID  | Path name                              | Genes                                                                                                                                                        | Enrichment | P-value  | FDR      |
|----------|----------------------------------------|--------------------------------------------------------------------------------------------------------------------------------------------------------------|------------|----------|----------|
| hsa04060 | Cytokine-cytokine receptor interaction | CCL1, CSF2, CCL2, CXCL5, CXCL3, TNFSF15, TNFRSF8, CCL19, CD40, TNFRSF4, CCL7, CXCL10, CCL24, INHBA, TNFSF10, PPBP, CXCL13, IL12B, XCL2, CSF2RA, IL3RA, CSF1R | 4.2657     | 2.88E-08 | 3.62E-05 |
| hsa05205 | Proteoglycans in cancer                | WNT5A, MRAS, MMP9, MET, TLR2, ITGB3, SRC, SDC2, PLAUR, HPSE, HBEGF, IL12B, THBS1, FGF2, AKT3                                                                 | 3.5337     | 7.46E-05 | 0.0938   |
| hsa04015 | Rap1 signaling pathway                 | FLT1, RASGRP3, PDGFB, PDGFA, MRAS, MET, CTNND1, PDGFC, LPAR1, ITGB3, THBS1, FGF2, AKT3, SRC, CSF1R                                                           | 3.3655     | 1.26E-04 | 0.1585   |
| hsa04062 | Chemokine signaling pathway            | CCL1, CCL2, CXCL5, CXCL3, CCL19, GNG11, SRC, CCL7, CXCL10, CCL24, PPBP, CXCL13, XCL2, AKT3                                                                   | 3.5464     | 1.38E-04 | 0.1738   |

Table SV. List of 38 significant differentially expressed miRNAs.

---

|    | miRNA            |
|----|------------------|
| 1  | hsa-let-7e-3p    |
| 2  | hsa-miR-10a-3p   |
| 3  | hsa-miR-1271-5p  |
| 4  | hsa-miR-1291     |
| 5  | hsa-miR-132-5p   |
| 6  | hsa-miR-147b     |
| 7  | hsa-miR-193a-3p  |
| 8  | hsa-miR-22-5p    |
| 9  | hsa-miR-31-3p    |
| 10 | hsa-miR-3173-5p  |
| 11 | hsa-miR-331-5p   |
| 12 | hsa-miR-337-3p   |
| 13 | hsa-miR-34a-5p   |
| 14 | hsa-miR-34c-5p   |
| 15 | hsa-miR-362-3p   |
| 16 | hsa-miR-362-5p   |
| 17 | hsa-miR-378a-5p  |
| 18 | hsa-miR-382-5p   |
| 19 | hsa-miR-3928-3p  |
| 20 | hsa-miR-422a     |
| 21 | hsa-miR-4775     |
| 22 | hsa-miR-500a-5p  |
| 23 | hsa-miR-550a-3p  |
| 24 | hsa-miR-5701     |
| 25 | hsa-miR-574-3p   |
| 26 | hsa-miR-582-5p   |
| 27 | hsa-miR-625-5p   |
| 28 | hsa-miR-627-5p   |
| 29 | hsa-miR-629-3p   |
| 30 | hsa-miR-642a-3p  |
| 31 | hsa-miR-6503-5p  |
| 32 | hsa-miR-6511a-3p |
| 33 | hsa-miR-652-5p   |
| 34 | hsa-miR-664b-3p  |
| 35 | hsa-miR-708-5p   |
| 36 | hsa-miR-708-3p   |
| 37 | hsa-miR-7977     |
| 38 | hsa-miR-940      |

---
